# Supplementary material for: Full space device optimization for solar cells
Source: PubMed Central journal article supplement (PMC5607268; doi:10.1038/s41598-017-12158-0), 2017-09-20
Supplement: 41598_2017_12158_MOESM1_ESM.pdf [file 41598_2017_12158_MOESM1_ESM.pdf]

# **Full Space Device Optimization for Solar Cells**

Ahmer A.B. Baloch, Shahzada P. Aly, Mohammad I. Hossain, Fedwa El Mellouhi,  
Nouar Tabet, and Fahhad H Alharbi

## **Supplementary Material**

## Supplementary Material

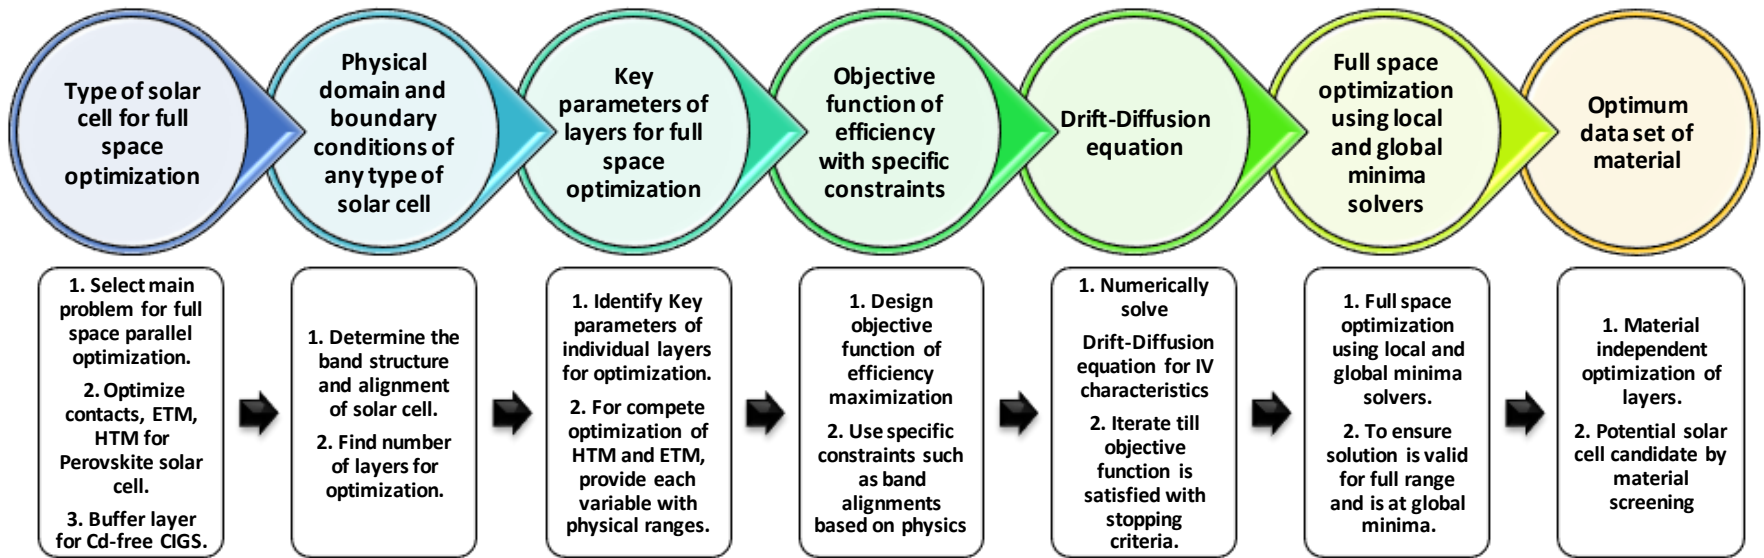

### Arbitrary device structure

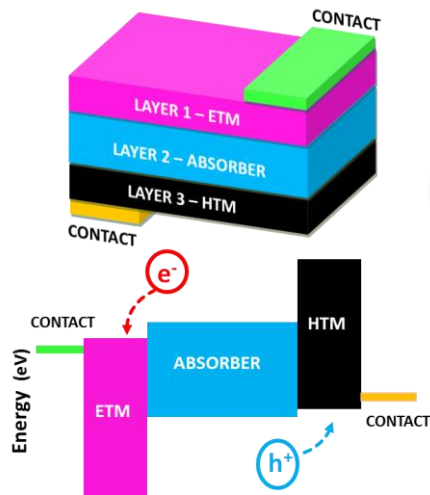

### Local and Global Optimizers

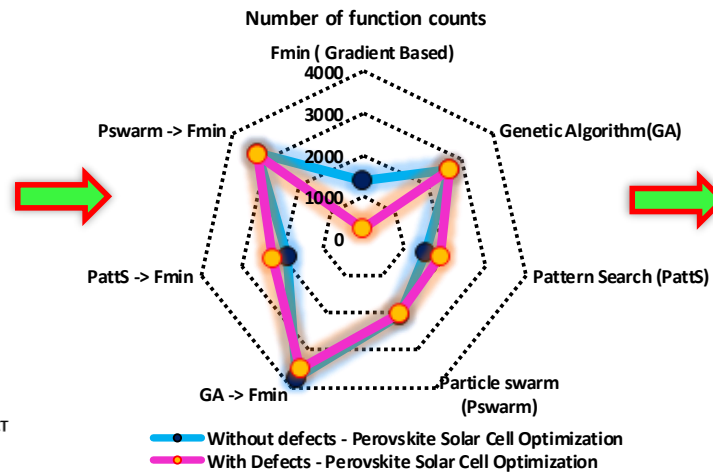

### Optimized material dataset and IV curve

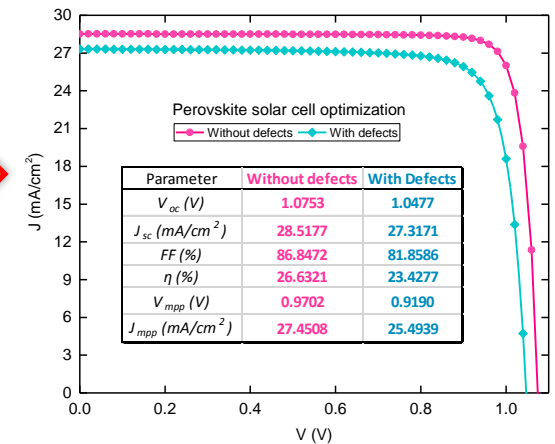

**Figure S1:** Detailed framework for full space optimization with schematics and results from simulation.

**Table S1**

Full space optimized parameters for PSC with Defects.

| PSC with Defects                   |                                             | Optimization Algorithms |              |               |                |            |               |                |
|------------------------------------|---------------------------------------------|-------------------------|--------------|---------------|----------------|------------|---------------|----------------|
| Variable                           | Unit                                        | fmin                    | GA           | PattS         | Particle Swarm | GA to Fmin | PattS to Fmin | Pswarm to Fmin |
| <b>Front Contact Work function</b> | eV                                          | 4.0964                  | 3.9137       | 4.1000        | 4.0021         | 3.9170     | 4.1000        | 4.0021         |
| <b>Back Contact Work function</b>  | eV                                          | 5.1738                  | 5.3478       | 5.2250        | 5.3900         | 5.3425     | 5.2250        | 5.3900         |
| <b>Thickness ETM</b>               | μm                                          | 0.1707                  | 0.3906       | 0.0750        | 0.0500         | 0.3694     | 0.0750        | 0.0500         |
| <b>Donor Conc. ETM</b>             | 1/cm <sup>3</sup><br>(10 <sup>value</sup> ) | 18.568<br>5             | 17.406<br>0  | 18.531<br>0   | 18.1480        | 17.3525    | 18.5310       | 18.1480        |
| <b>Energy Gap ETM</b>              | eV                                          | 3.9375                  | 3.6517       | 4.0000        | 4.0000         | 3.6606     | 4.0000        | 4.0000         |
| <b>Electron Mobility ETM</b>       | cm <sup>2</sup> /V.s                        | 175.49<br>44            | 1.4204       | 200.00<br>00  | 233.9900       | 2.8493     | 200.0000      | 233.9900       |
| <b>Hole Mobility ETM</b>           | cm <sup>2</sup> /V.s                        | 5.4444                  | 0.3584       | 1.0000        | 3.3803         | 0.2875     | 1.0000        | 3.3803         |
| <b>Absorbtion Coeff. ETM</b>       | 1/cm.eV <sup>1/2</sup>                      | 125.74<br>77            | 126.32<br>81 | 125.89<br>25  | 1557.0408      | 138.6756   | 125.8925      | 1557.0408      |
| <b>CB DOS ETM</b>                  | 1/cm <sup>3</sup><br>(10 <sup>value</sup> ) | 18.568<br>6             | 18.168<br>0  | 18.531<br>0   | 18.1640        | 18.1694    | 18.5310       | 18.1640        |
| <b>VB DOS ETM</b>                  | 1/cm <sup>3</sup><br>(10 <sup>value</sup> ) | 18.524<br>1             | 18.121<br>0  | 18.000<br>0   | 18.0880        | 18.0934    | 18.0000       | 18.0880        |
| <b>Affinity Energy ETM</b>         | eV                                          | 4.0303                  | 3.9117       | 4.0000        | 3.9913         | 3.9091     | 4.0000        | 3.9913         |
| <b>Dielectric Perm. ETM</b>        | -                                           | 7.3402                  | 5.6484       | 6.5000        | 6.0039         | 5.7548     | 6.5000        | 6.0039         |
| <b>Thickness Perovskite</b>        | μm                                          | 0.7321                  | 0.7291       | 0.7324        | 0.7324         | 0.7375     | 0.7324        | 0.7324         |
| <b>Thickness HTM</b>               | μm                                          | 0.4989                  | 0.0743       | 0.4500        | 0.5000         | 0.0742     | 0.4500        | 0.5000         |
| <b>Acceptor Conc. HTM</b>          | 1/cm <sup>3</sup><br>(10 <sup>value</sup> ) | 18.206<br>6             | 18.048<br>0  | 19.000<br>0   | 18.0000        | 18.0672    | 19.0000       | 18.0000        |
| <b>Energy Gap HTM</b>              | eV                                          | 3.3645                  | 2.8238       | 2.8996        | 2.9872         | 2.8235     | 2.8999        | 2.9872         |
| <b>Electron Mobility HTM</b>       | cm <sup>2</sup> /V.s                        | 4.9727                  | 1.8524       | 2.0000        | 3.8813         | 1.5428     | 2.0000        | 3.8813         |
| <b>Hole Mobility HTM</b>           | cm <sup>2</sup> /V.s                        | 436.13<br>25            | 155.83<br>00 | 200.00<br>00  | 230.8800       | 176.6236   | 200.0000      | 307.7459       |
| <b>Absorbtion Coeff. HTM</b>       | 1/cm.eV <sup>1/2</sup>                      | 8529.0<br>370           | 211.54<br>37 | 1258.9<br>254 | 1737.0007      | 213.8454   | 1258.9254     | 1737.0007      |
| <b>CB DOS HTM</b>                  | 1/cm <sup>3</sup><br>(10 <sup>value</sup> ) | 19.958<br>9             | 18.061<br>0  | 18.000<br>0   | 18.2750        | 18.0673    | 18.0000       | 18.2750        |
| <b>VB DOS HTM</b>                  | 1/cm <sup>3</sup><br>(10 <sup>value</sup> ) | 18.207<br>0             | 18.058<br>0  | 19.000<br>0   | 18.0000        | 18.0674    | 19.0000       | 18.0000        |
| <b>Affinity Energy HTM</b>         | eV                                          | 2.0355                  | 2.5767       | 2.5000        | 2.4128         | 2.5765     | 2.5000        | 2.4128         |
| <b>Dielectric Perm. HTM</b>        | -                                           | 16.161<br>2             | 4.9913       | 20.000<br>0   | 20.0000        | 7.2553     | 20.0000       | 20.0000        |

**Table S2**

Full space optimized parameters for PSC without Defects.

| PSC without Defects         |                                             |              | Optimization Algorithms |              |                |            |               |                |
|-----------------------------|---------------------------------------------|--------------|-------------------------|--------------|----------------|------------|---------------|----------------|
| Variable                    | Unit                                        | fmin         | GA                      | PattS        | Particle Swarm | GA to Fmin | PattS to Fmin | Pswarm to Fmin |
| Front Contact Work function | eV                                          | 4.0763       | 4.114<br>2              | 4.1000       | 4.0763         | 4.0398     | 4.1000        | 4.0763         |
| Back Contact Work function  | eV                                          | 5.3759       | 5.144<br>9              | 5.3500       | 5.3758         | 5.2561     | 5.3500        | 5.3758         |
| Thickness ETM               | μm                                          | 0.5000       | 0.123<br>9              | 0.0594       | 0.5000         | 0.0703     | 0.0594        | 0.5000         |
| Donor Conc. ETM             | 1/cm <sup>3</sup><br>(10 <sup>value</sup> ) | 17.779<br>1  | 16.39<br>00             | 17.828<br>0  | 17.7790        | 16.3652    | 17.8280       | 17.7790        |
| Energy Gap ETM              | eV                                          | 4.0000       | 3.319<br>5              | 4.0000       | 4.0000         | 3.4842     | 4.0000        | 4.0000         |
| Electron Mobility ETM       | cm <sup>2</sup> /V.s                        | 191.35<br>61 | 2.621<br>4              | 200.00<br>00 | 191.3800       | 19.4276    | 200.0000      | 191.3800       |
| Hole Mobility ETM           | cm <sup>2</sup> /V.s                        | 5.4391       | 4.054<br>8              | 1.0000       | 5.4389         | 3.6442     | 1.0000        | 5.4389         |
| Absorbtion Coeff. ETM       | 1/cm.eV <sup>1/2</sup>                      | 2.0000       | 2.200<br>6              | 2.0375       | 2.0000         | 2.0277     | 2.0375        | 2.0000         |
| CB DOS ETM                  | 1/cm <sup>3</sup><br>(10 <sup>value</sup> ) | 18.748<br>9  | 19.45<br>80             | 20.000<br>0  | 18.7490        | 19.5973    | 20.0000       | 18.7500        |
| VB DOS ETM                  | 1/cm <sup>3</sup><br>(10 <sup>value</sup> ) | 18.037<br>9  | 19.09<br>20             | 18.000<br>0  | 18.0380        | 18.8936    | 18.0000       | 18.0380        |
| Affinity Energy ETM         | eV                                          | 4.0692       | 3.937<br>8              | 4.0000       | 4.0692         | 3.9354     | 4.0000        | 4.0692         |
| Dielectric Perm. ETM        | -                                           | 8.3914       | 3.476<br>2              | 19.000<br>0  | 8.3917         | 3.8342     | 19.0000       | 8.3917         |
| Thickness Perovskite        | μm                                          | 1.1024       | 1.099<br>3              | 1.1094       | 1.1017         | 1.1104     | 1.1094        | 1.1019         |
| Thickness HTM               | μm                                          | 0.4995       | 0.442<br>5              | 0.4969       | 0.5000         | 0.4393     | 0.4969        | 0.4993         |
| Acceptor Conc. HTM          | 1/cm <sup>3</sup><br>(10 <sup>value</sup> ) | 17.999<br>9  | 18.69<br>60             | 19.000<br>0  | 18.0000        | 18.7599    | 19.0000       | 18.0000        |
| Energy Gap HTM              | eV                                          | 3.3337       | 3.601<br>6              | 2.8996       | 3.3337         | 3.6004     | 2.8996        | 3.3337         |
| Electron Mobility HTM       | cm <sup>2</sup> /V.s                        | 4.5182       | 0.275<br>5              | 2.0000       | 4.5184         | 1.2107     | 2.0000        | 4.5184         |
| Hole Mobility HTM           | cm <sup>2</sup> /V.s                        | 361.03<br>23 | 3.357<br>7              | 200.00<br>00 | 360.9900       | 3.7668     | 200.0000      | 360.9900       |
| Absorbtion Coeff. HTM       | 1/cm.eV <sup>1/2</sup>                      | 3.7570       | 3.061<br>3              | 3.1000       | 3.7569         | 2.9416     | 3.1000        | 3.7569         |
| CB DOS HTM                  | 1/cm <sup>3</sup><br>(10 <sup>value</sup> ) | 19.342<br>1  | 19.35<br>60             | 18.000<br>0  | 19.3420        | 19.4116    | 18.0000       | 19.3420        |
| VB DOS HTM                  | 1/cm <sup>3</sup><br>(10 <sup>value</sup> ) | 18.000<br>0  | 18.69<br>80             | 19.000<br>0  | 18.0000        | 18.7610    | 19.0000       | 18.0000        |
| Affinity Energy HTM         | eV                                          | 2.0663       | 1.793<br>2              | 2.5000       | 2.0663         | 1.7996     | 2.5000        | 2.0663         |
| Dielectric Perm. HTM        | -                                           | 20.000<br>0  | 4.124<br>1              | 20.000<br>0  | 20.0000        | 4.5051     | 20.0000       | 20.0000        |

**Table S3**

Full space optimized parameters for CIGS

| <b>CIGS for non-toxic ETM</b>      |                                     | <b>Optimization - Gradient based (fmin)</b>   |                                            |
|------------------------------------|-------------------------------------|-----------------------------------------------|--------------------------------------------|
| <b>Variable</b>                    | <b>Unit</b>                         | <b>Without<br/>thickness of CIGS absorber</b> | <b>With<br/>thickness of CIGS absorber</b> |
| <b>Thickness ETM</b>               | $\mu\text{m}$                       | 0.010001                                      | 0.010124                                   |
| <b>Donor Conc. ETM</b>             | $1/\text{cm}^3 (10^{\text{value}})$ | 18.998                                        | 18.957                                     |
| <b>Acceptor Conc. ETM</b>          | $1/\text{cm}^3 (10^{\text{value}})$ | 1.4922                                        | 0.72606                                    |
| <b>Energy Gap ETM</b>              | eV                                  | 2.9982                                        | 3.2456                                     |
| <b>Affinity Energy ETM</b>         | eV                                  | 4.2035                                        | 4.2138                                     |
| <b>Dielectric Perm. ETM</b>        | -                                   | 14.857                                        | 7.3719                                     |
| <b>Electron Mobility ETM</b>       | $\text{cm}^2/\text{V.s}$            | 12.484                                        | 18.676                                     |
| <b>Hole Mobility ETM</b>           | $\text{cm}^2/\text{V.s}$            | 382.09                                        | 12.841                                     |
| <b>VB DOS ETM</b>                  | $1/\text{cm}^3 (10^{\text{value}})$ | 18.362                                        | 18.824                                     |
| <b>CB DOS ETM</b>                  | $1/\text{cm}^3 (10^{\text{value}})$ | 18.001                                        | 18.763                                     |
| <b>Absorbtion Coeff. ETM</b>       | $1/\text{cm.eV}^{1/2}$              | 1001.5                                        | 18381                                      |
| <b>Front Contact Work function</b> | eV                                  | 4.2035                                        | 4.2138                                     |
| <b>Thickness CIGS Absorber</b>     | $\mu\text{m}$                       |                                               | 3.9999                                     |
